# Supplementary material
Source: PubMed Central journal article supplement (PMC3346075)
Supplement: supp_M112.351213_jbc.M112.351213-1.pdf [file supp_M112.351213_jbc.M112.351213-1.pdf]

## Supplemental data

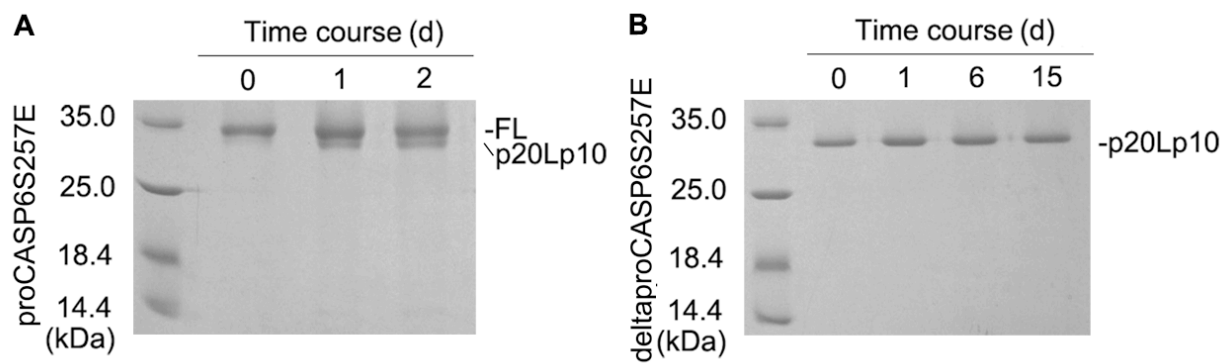

**Figure S1: The S257E mutation inhibited CASP6 self-activation** Stability assay of (A) proCASP6S257E and (B)  $\Delta$ proCASP6S257E. FL, full length; p20, large subunit; L, intersubunit linker.

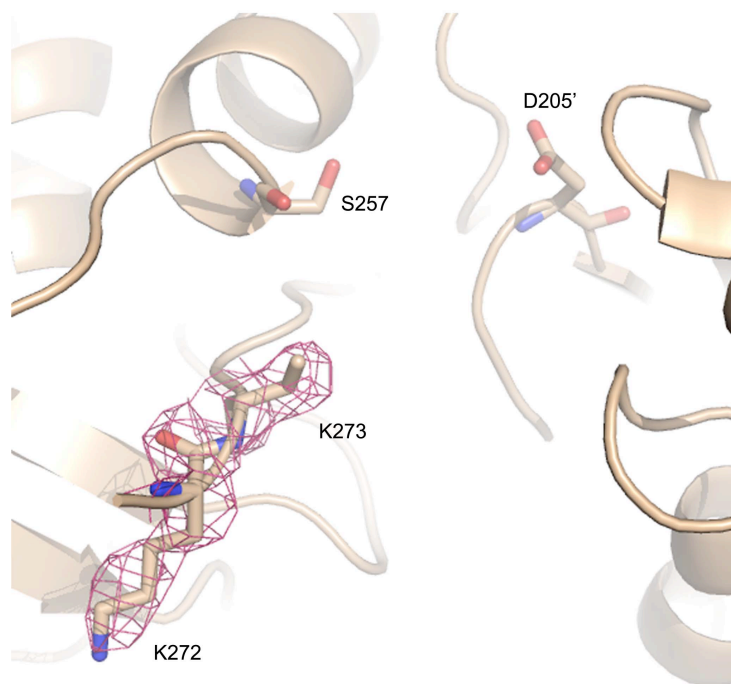

**Figure S2: The electron density map of Lys272 and Lys273 in CASP6 zymogen** The electron density map (2fo-fc maps) was shown at 1.0  $\sigma$ , calculated by PHENIX refine.

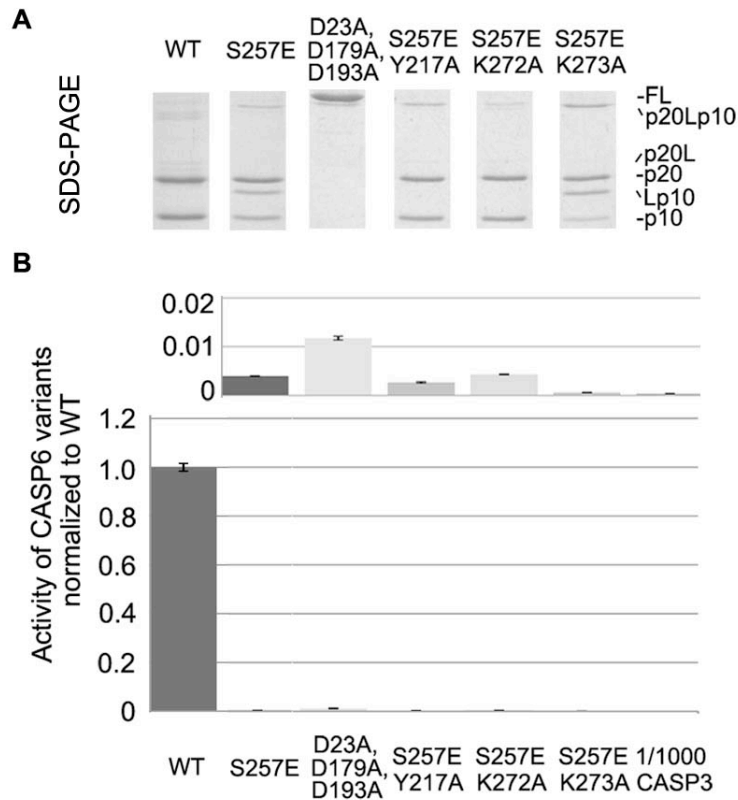

**Figure S3: The S257E mutation inhibited CASP6 activity**

Coomassie-blue-stained SDS-PAGE gels (A) and the VEIDase activity (B) of 1/1000 CASP3 processed CASP6 variants, normalized to WT CASP6. The activity of 1/1000 CASP3 is shown as a negative control. The activities with low values are also shown in a zoom-in view. The assays were done in triplicate and error bars represent s.d. FL, full length; p20, large subunit; L, intersubunit linker; p10, small subunit; WT, wild type.

**Table S1 : The quantitative data of Thrombin proteolytic processing assay.**

| $\Delta$ proCASP6D179Th variants | Time course (h) |   |      |      |      |      |
|----------------------------------|-----------------|---|------|------|------|------|
|                                  | 0               | 1 | 2    | 4    | 6    | 24   |
| S257E,C163A                      | -               | 0 | 0    | 0    | 0    | 0    |
| S257E                            | -               | 0 | 0    | 46.6 | 91.7 | 100  |
| S257E,H168A                      | -               | 0 | 0    | 0    | 12.6 | 20.3 |
| S257E,H219A                      | -               | 0 | 0    | 0    | 28.1 | 49.3 |
| S257E,Y217A                      | -               | 0 | 72.8 | 100  | 100  | 100  |
| S257E,K272A                      | -               | 0 | 76.0 | 100  | 100  | 100  |

The number shown in table are the percentage of Asp193 cleavage in Thrombin cleavage assay, which was calculated by scanning the SDS-PAGE in Fig.4C-4H and using intensity of p10 band divide by the sum of p10 band intensity plus Lp10 band intensity. The “-“ symbols in 0 h column mean at 0 h time point no Lp10 nor p10 band were shown in the SDS-PAGE.
